# Supplementary material
Source: PubMed Central journal article supplement (PMC8600672)
Supplement: sj-pdf-1-sel-10.1177_1758573220942923.pdf [file sj-pdf-1-sel-10.1177_1758573220942923.pdf]

Supplementary File 1: Comparison of long head of biceps tenotomy versus tenodesis for Constant-Murley scores at (A) 6 months and at (B) 12 months and (C) 2 years postoperatively.

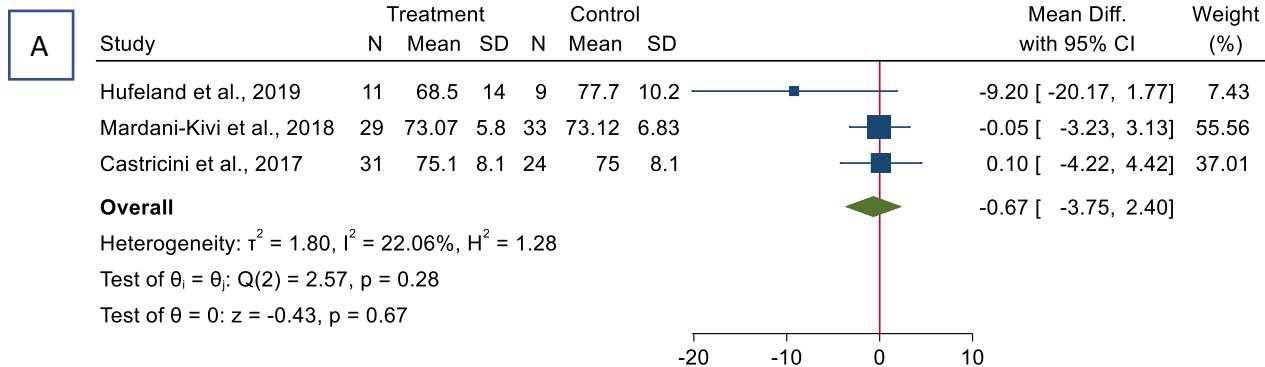

Random-effects DerSimonian-Laird model

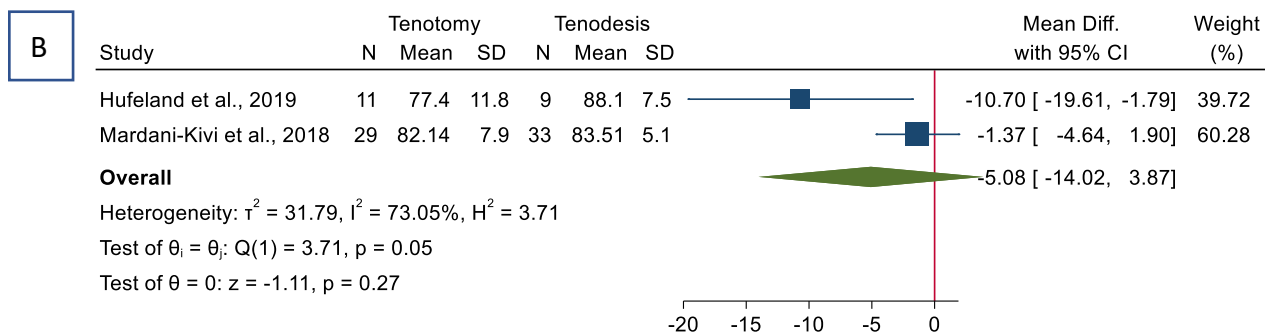

Random-effects DerSimonian-Laird model

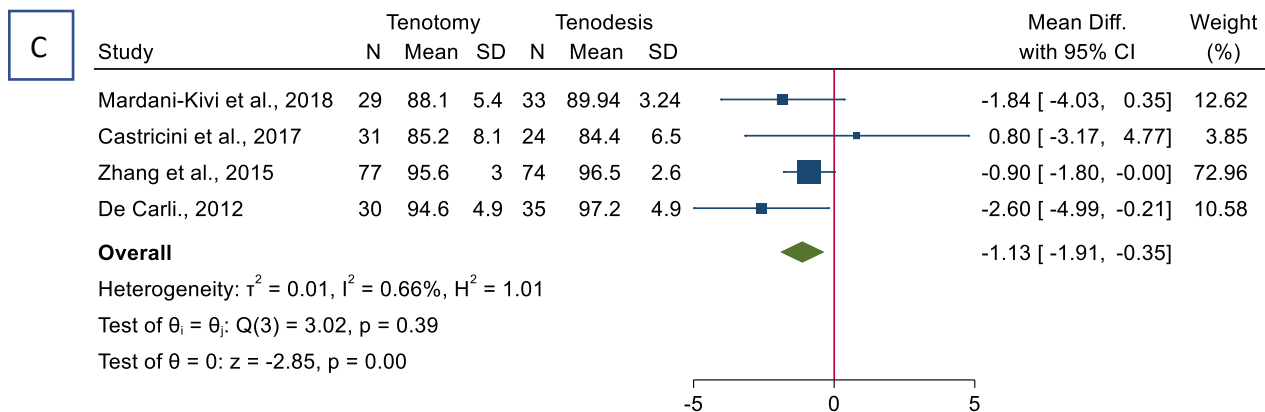

Random-effects DerSimonian-Laird model
