# Supplementary material
Source: PubMed Central journal article supplement (PMC8600672)

Supplementary File 2: Comparison of long head of biceps tenotomy versus tenodesis for the American Shoulder and Elbow Society scores at (A) 6 months and at (B) 12 months and (C) 2 years postoperatively.

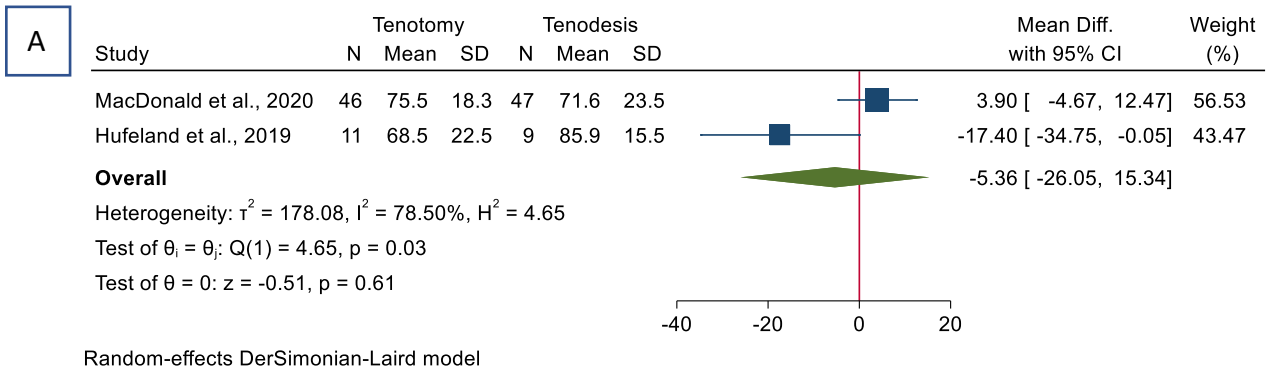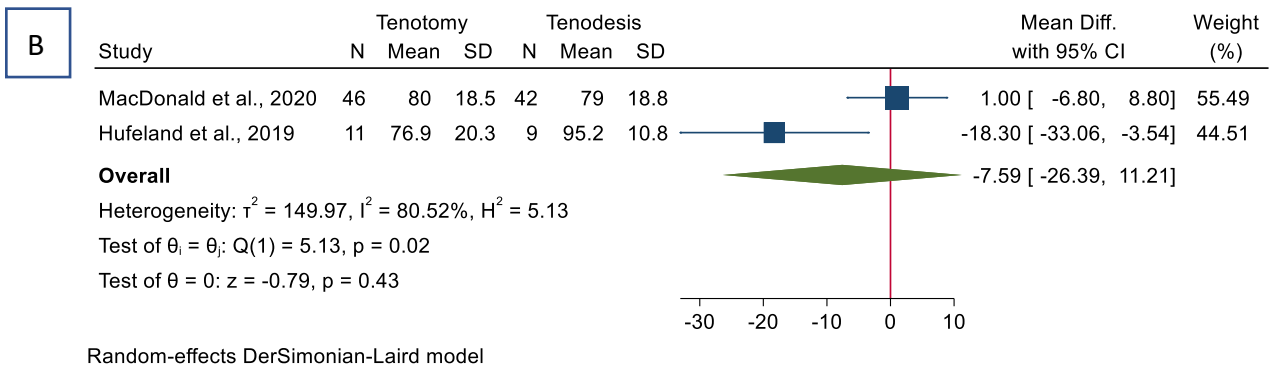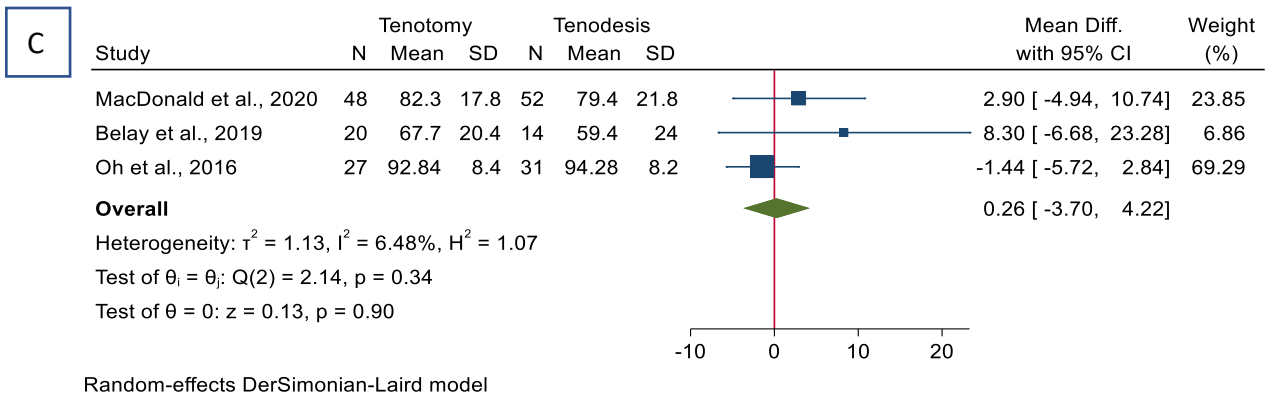

Supplement: sj-pdf-2-sel-10.1177_1758573220942923.pdf [file sj-pdf-2-sel-10.1177_1758573220942923.pdf]
