# Supplementary material
Source: PubMed Central journal article supplement (PMC8600672)

Supplementary File 3: Comparison of the Visual Analogue Scale for Pain at (A) 6 months, at (B) 12 months and at (C) 2 years postoperatively between long head of biceps tendon tenotomy and tenodesis.

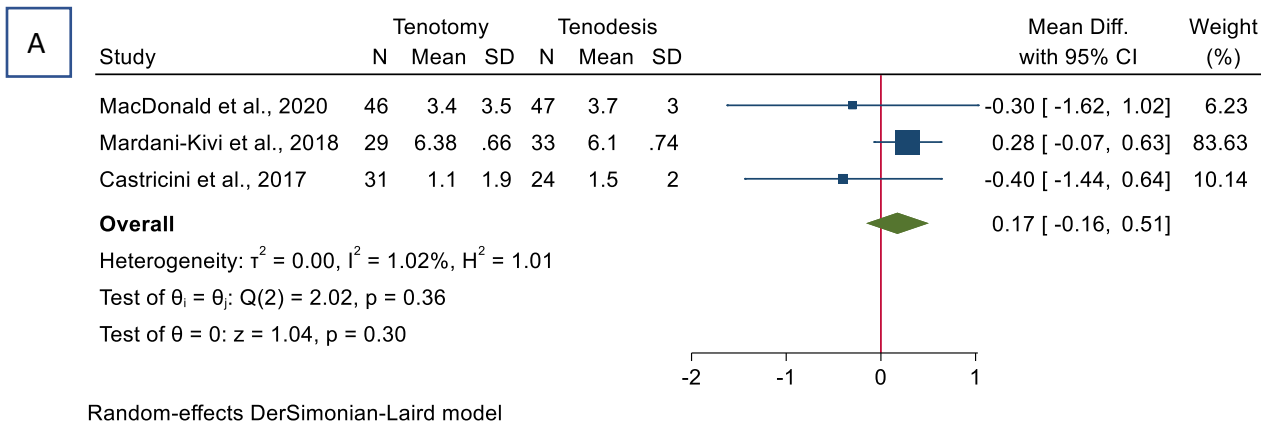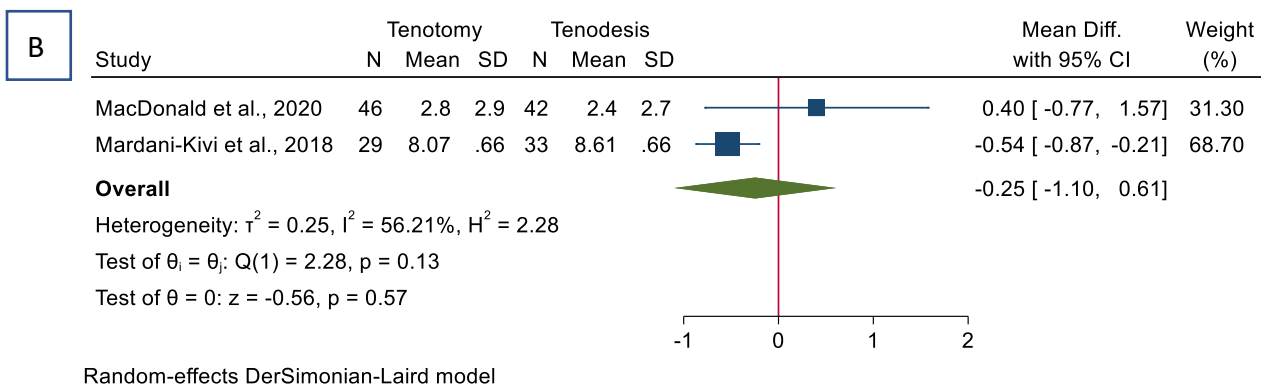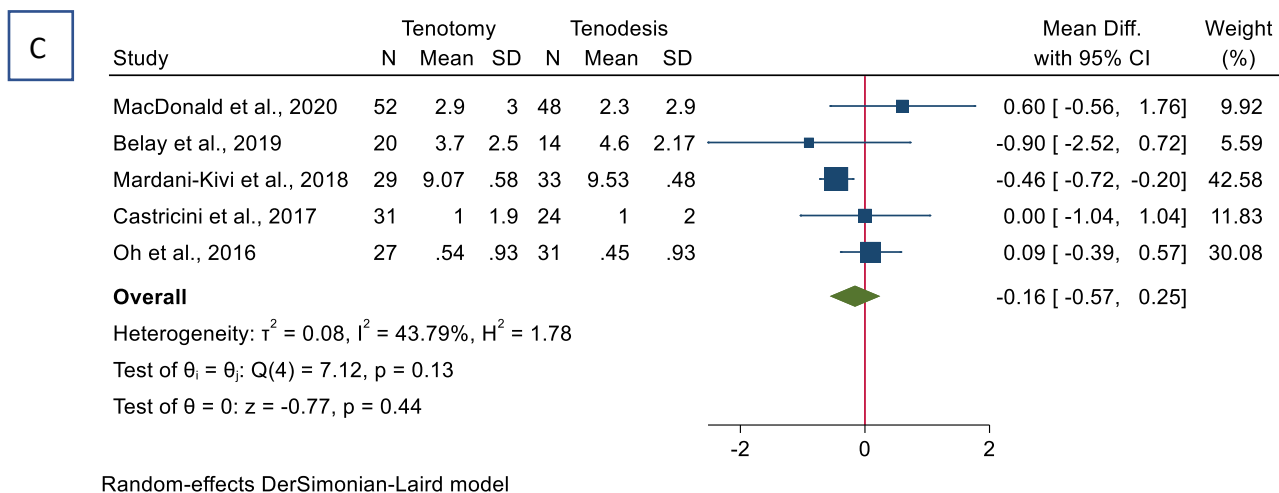

Supplement: sj-pdf-3-sel-10.1177_1758573220942923.pdf [file sj-pdf-3-sel-10.1177_1758573220942923.pdf]
