# Supplementary material
Source: PubMed Central journal article supplement (PMC8600672)
Supplement: sj-pdf-5-sel-10.1177_1758573220942923.pdf [file sj-pdf-5-sel-10.1177_1758573220942923.pdf]

Supplementary File 5: Comparison of the incidence of Popeye's deformity between long head of biceps tendon tenotomy and tenodesis.

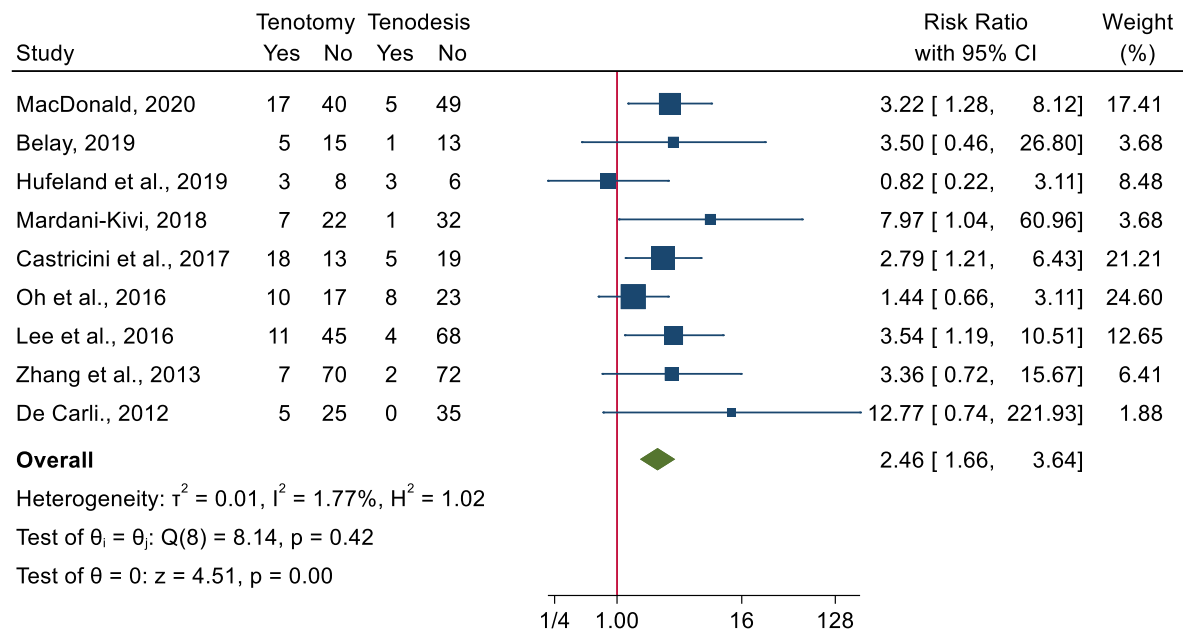

Random-effects DerSimonian-Laird model
